# Supplementary material for: High expression of Linc00959 predicts poor prognosis in breast cancer
Source: Springer Nature journal article supplement (doi:10.1186/s12935-019-0748-7), 2019-02-20

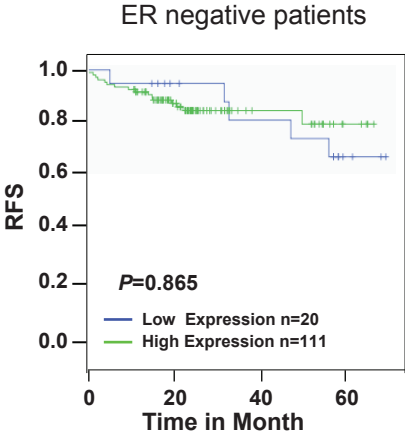

Supplement: MOESM1 [file 16495192]
